# Supplementary material for: A study of the Rashba effect in two-dimensional ternary compounds ABC monolayers (A = Sb, Bi; B = Se, Te; C = Br; I)
Source: Royal Society of Chemistry journal article supplement (doi:10.1039/d2cp05002a), 2022-12-23
Supplement: d2cp05002a1.pdf [file d2cp05002a1.pdf]

## Study of Rashba effect in two-dimensional ternary compounds

ABC (A = Sb, Bi; B = Se, Te; C = Br, I)

Tongwei Li, Yanmin Xu, Mengjie Li, Qingxiao Zhou,  
Caixia Wu, Zhaowu Wang, Weiwei Ju\*

College of Physics and Engineering, Henan University of Science and Technology,  
Luoyang 471023, China

### Supplementary Materials

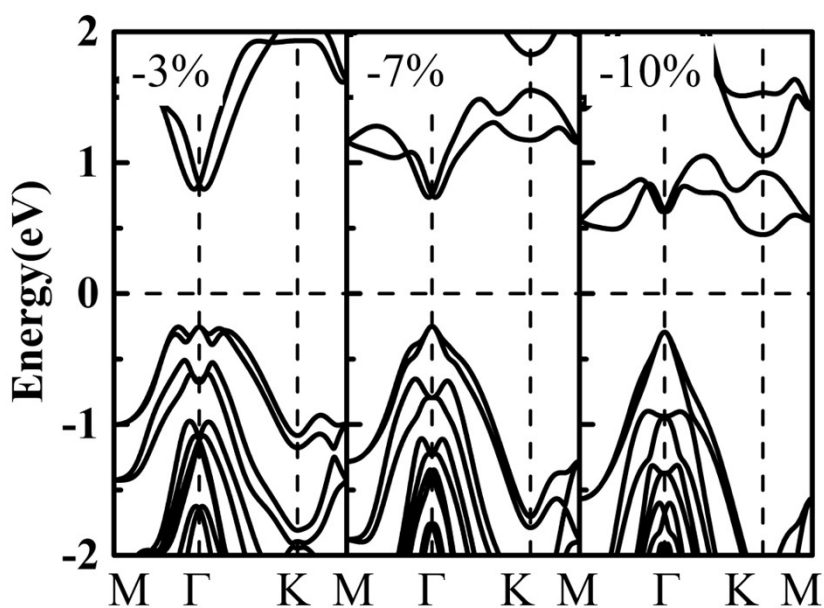

**Fig. S1** Energy band structures of BiSeI monolayer with in-plane strains of -3%, -7%, and -10%.

---

\* Corresponding author, Email: [hjww@126.com](mailto:hjww@126.com)

**Table S1** Structural parameters of ABC (A = Sb, Bi; B = Se, Te; C = Br; I) monolayers: space group; lattice constants  $a$ ; bond length  $d$ ; bond angle  $\theta$ ; thickness  $t$  of monolayer; binding energy  $E_b$ .

| <i>Systems</i> | <i>Space group</i> | $a(\text{\AA})$ | $d(\text{\AA})$ |            | $\theta(^{\circ})$ |              | $t(\text{\AA})$ | $E_b$ (eV) |
|----------------|--------------------|-----------------|-----------------|------------|--------------------|--------------|-----------------|------------|
|                |                    |                 | <i>A-B</i>      | <i>A-C</i> | <i>B-A-B</i>       | <i>B-C-B</i> |                 |            |
| <i>SbSeI</i>   | <i>P3m1</i>        | 4.09            | 2.80            | 3.18       | 93.99              | 56.39        | 3.63            | -8.26      |
| <i>SbTeI</i>   | <i>P3m1</i>        | 4.21            | 2.98            | 3.19       | 90.01              | 55.79        | 3.79            | -7.90      |
| <i>SbSeBr</i>  | <i>P3m1</i>        | 4.01            | 2.79            | 3.00       | 91.88              | 57.53        | 3.46            | -8.63      |
| <i>SbTeBr</i>  | <i>P3m1</i>        | 4.14            | 2.97            | 3.01       | 88.44              | 57.42        | 3.59            | -8.27      |
| <i>BiSeI</i>   | <i>P3m1</i>        | 4.16            | 2.86            | 3.25       | 93.47              | 55.84        | 3.74            | -8.60      |
| <i>BiTeI</i>   | <i>P3m1</i>        | 4.28            | 3.04            | 3.26       | 89.53              | 55.24        | 3.90            | -8.20      |
| <i>BiSeBr</i>  | <i>P3m1</i>        | 4.09            | 2.85            | 3.06       | 91.71              | 57.36        | 3.55            | -9.00      |
| <i>BiTeBr</i>  | <i>P3m1</i>        | 4.22            | 3.03            | 3.07       | 88.22              | 57.17        | 3.68            | -8.60      |
